# Supplementary material
Source: publisher figshare collection journal article supplement (https://tandf.figshare.com/ndownloader/files/13372844)
Supplement: Supplementary file 1 [file 13372844]

**Supplementary Table.** Antiepileptic drugs of Fracture Cases and Matched Non-fractured Controls

|  | Case |  | Control |
| --- | --- | --- | --- |
|  | (n=2,196) |  | (n=8,784) |
| AED | n (%) |  | n(%) |
| Carbamazepine | 55(2.50) |  | 118(1.34) |
| Gabapentin | 38(1.73) |  | 97(1.10) |
| Lamotrigine | 2(0.09) |  | 7(0.08) |
| Levetiracetam | 9(0.41) |  | 14(0.16) |
| Oxcarbazepine | 32(1.46) |  | 40(0.46) |
| Phenobarbital | 15(0.68) |  | 12(0.14) |
| Phenytoin | 19(0.87) |  | 95(1.08) |
| Topiramate | 5(0.23) |  | 24(0.27) |
| Valproic acid | 33(1.50) |  | 99(1.13) |
| Multiple current AEDs | 17(0.77) |  | 42(0.48) |

AED, antiepileptic drug.
